# Supplementary material for: Wear Mechanisms, Composition and Thickness of Antiwear Tribofilms Formed from Multi-Component Lubricants
Source: MDPI journal article supplement (doi:10.3390/ma17102324), 2024-05-14

# Supplementary Material

## SI. Elemental composition

Surface elemental compositions for on- and off-scar locations for various blends and loads are listed in the following table.

| Contact Conditions |                | Surface Location | Element Concentration (at%) |      |       |      |       |      |      |      |      |       |
|--------------------|----------------|------------------|-----------------------------|------|-------|------|-------|------|------|------|------|-------|
| Blend              | Load (kg)      |                  | C                           | N    | O     | Si   | P     | S    | Cl   | Ca   | Fe   | Zn    |
| Blend 1            | 1.22           | On-Scar          | 46.7                        | 2.4  | 33.9  | 10.6 | 0.8   | 0.3  | 0.1  | 0.4  | 2.4  | --    |
|                    |                | Off-Scar         | 52.2                        | 2.9  | 32.8  | 1.3  | --    | 0.6  | 0.1  | 0.3  | 4.7  | --    |
| Blend 1            | 2.45 (Mode 1)  | On-Scar          | 36.94                       | 1.16 | 43.45 | 8.96 | 1.86  | 0.33 | --   | 0.11 | 3.31 | 0.55  |
|                    |                | Off-Scar         | 45.52                       | 1.41 | 38.43 | 0.57 | --    | 0.17 | --   | 0.62 | 6.48 | 0.21  |
| Blend 1            | 2.45 (Mode 2)  | On-Scar          | 33.52                       | 0.47 | 45.49 | 4.19 | 0.63  | 0.1  | --   | 0.21 | 7.6  | 0.15  |
|                    |                | Off-Scar         | 36.75                       | 0.58 | 42.57 | 0.69 | 0.15  | 0.1  | --   | 0.49 | 9.27 | 0.13  |
| Blend 2            | 1.22           | On-Scar          | 34.87                       | 2.56 | 40.21 | 0.39 | 5.38  | 3.06 | --   | 0.31 | 3.45 | 6.26  |
|                    |                | Off-Scar         | 36.89                       | 1    | 40.88 | 0.6  | 0.87  | 0.93 | --   | 0.51 | 6.96 | 4.31  |
| Blend 2            | 10.15 (Mode 1) | On-Scar          | 24.42                       | 2.98 | 46.79 | 0.82 | 11.24 | 2.06 | --   | --   | --   | 11.6  |
|                    |                | Off-Scar         | 34.09                       | 1.94 | 42.55 | 0.18 | 1.29  | 1.3  | --   | 0.98 | 6.77 | 4.07  |
| Blend 2            | 10.15 (Mode 2) | On-Scar          | 26.29                       | 2.85 | 45.67 | 1.08 | 10.07 | 2.56 | --   | 0.2  | 0.82 | 9.66  |
|                    |                | Off-Scar         | 40.22                       | 1.39 | 39.65 | 0.22 | 0.77  | 1.07 | 0.15 | 0.72 | 6.66 | 2.5   |
| Blend 3            | 1.22           | On-Scar          | 36.86                       | 2.04 | 41.19 | 0.46 | 4.85  | 3.71 | 0.24 | 0.34 | 2.28 | 5.76  |
|                    |                | Off-Scar         | 46.79                       | 1.67 | 38.82 | 0.15 | 0.4   | 0.93 | --   | 0.49 | 4.37 | 1.91  |
| Blend 3            | 10.15          | On-Scar          | 23.12                       | 2.54 | 48.55 | 0.71 | 10.11 | 2.36 | 0.23 | 0.14 | 0.17 | 11.91 |
|                    |                | Off-Scar         | 39.26                       | 3.91 | 39.51 | 0.2  | 0.4   | 1.5  | 0.72 | 0.51 | 4.51 | 4.95  |
| Blend 4            | 1.22           | On-Scar          | 36.36                       | 2.84 | 44.09 | 0.45 | 0.94  | 0.46 | --   | 0.73 | 6.96 | 0.16  |
|                    |                | Off-Scar         | 43.36                       | 3.97 | 39.13 | --   | --    | 0.39 | --   | 1.12 | 5.95 | --    |
| Blend 5            | 1.22           | On-Scar          | 57.04                       | 1.38 | 32.11 | 0.96 | 0.99  | --   | --   | 0.31 | 3.56 | --    |
|                    |                | Off-Scar         | 43.1                        | 3.07 | 41.13 | --   | 0.18  | --   | 0.14 | 0.45 | 5.9  | --    |
| Blend 6            | 1.22           | On-Scar          | 41.23                       | 2.68 | 36.87 | 0.71 | 2.3   | 2.4  | 0.14 | 0.78 | 3.69 | 5.51  |
|                    |                | Off-Scar         | 43.64                       | 3.28 | 36.66 | 0.38 | 0.11  | 0.25 | --   | 0.53 | 7.15 | 0.79  |
| Blend 6            | 7.49 (Mode 1)  | On-Scar          | 49.26                       | 4.87 | 24.04 | 1.74 | 11.4  | 6.39 | 0.15 | 0.5  | 0.58 | 0.47  |
|                    |                | Off-Scar         | 56.46                       | 5.17 | 30.77 | 0.24 | 0.41  | 0.56 | 0.13 | 0.87 | 2.62 | 0.14  |
| Blend 6            | 7.49 (Mode 2)  | On-Scar          | 40.8                        | 5.16 | 40.2  | 0.52 | 7.49  | 4.03 | --   | --   | 0.45 | 0.86  |
|                    |                | Off-Scar         | 49.82                       | 4.6  | 33.8  | 0.38 | 0.45  | 0.12 | --   | 0.75 | 4.61 | 0.81  |
| Blend 6            | 10.15          | On-Scar          | 40.21                       | 4.44 | 37.33 | 0.99 | 8.41  | 3.96 | --   | 0.41 | 0.92 | 2.4   |
|                    |                | Off-Scar         | 49.08                       | 5.37 | 34.6  | 0.15 | 0.31  | 1.01 | --   | 0.66 | 4.06 | 0.64  |
| Blend 7            | 1.22           | On-Scar          | 45.84                       | 3.47 | 36.72 | 0.67 | 4.2   | 2.47 | --   | 0.78 | 1.59 | 2.69  |
|                    |                | Off-Scar         | 49.71                       | 2.24 | 35.48 | 0.52 | 0.43  | 0.32 | --   | 0.83 | 4.77 | 0.91  |
| Blend 7            | 7.49 (Mode 1)  | On-Scar          | 37.22                       | 2.37 | 40.31 | 0.29 | 7.39  | 2.88 | --   | 0.41 | 1.22 | 6.64  |
|                    |                | Off-Scar         | 55.08                       | 2.46 | 32.84 | 0.17 | 0.4   | 0.39 | 0.14 | 0.59 | 3.56 | 0.81  |
| Blend 7            | 7.49 (Mode 2)  | On-Scar          | 27.41                       | 1.5  | 43.52 | 0.59 | 8.34  | 2.98 | --   | 0.39 | 1.36 | 12.53 |
|                    |                | Off-Scar         | 36.24                       | 1.38 | 41.85 | 0.24 | 0.16  | 0.15 | 0.15 | 0.36 | 8.83 | 1.79  |
| Blend 7            | 10.15 (Mode 1) | On-Scar          | 34.85                       | 1.68 | 41.21 | 0.49 | 7.46  | 2.62 | --   | 0.39 | 1.39 | 8.51  |
|                    |                | Off-Scar         | 49.19                       | 2.84 | 34.44 | 0.21 | 0.35  | 0.64 | --   | 0.55 | 5.29 | 1.16  |
| Blend 7            | 10.15 (Mode 2) | On-Scar          | 30.29                       | 1.58 | 43.75 | 0.56 | 7.94  | 2.62 | 0.11 | 0.4  | 2.15 | 8.48  |
|                    |                | Off-Scar         | 50.28                       | 2.69 | 35.23 | 0.35 | 0.44  | 0.95 | --   | 0.5  | 3.99 | 1.56  |

## SII. Chemical composition

On- and off-scar surface chemical compositions for various blends and loads are listed in the following tables.

### Blend 1 (base oil)

| Load (kg)      | Element | On-Scar Analysis |               |                         | Off-Scar Analysis |               |
|----------------|---------|------------------|---------------|-------------------------|-------------------|---------------|
|                |         | Energy (eV)      | Peak Area (%) | Chemical State          | Energy (eV)       | Peak Area (%) |
| 1.22           | C       | 284.44           | 64%           | Hydrocarbon             | 284.73            | 60%           |
|                |         | 286.29           | 22%           | Alcohol/ether           | 286.71            | 21%           |
|                |         | 288.27           | 14%           | Carboxyl                | 288.52            | 19%           |
|                | S       | 162.01           | 0%            | Sulfide, mercaptan      | 163.75            | 24%           |
|                |         | 168.86           | 100%          | Sulfate, sulfone        | 169.01            | 76%           |
|                | Fe      | 710.28           | 100%          | Iron oxides, hydroxides | 710.18            | 100%          |
| 2.45<br>Mode 1 | C       | 284.76           | 74%           | Hydrocarbon             | 284.83            | 63%           |
|                |         | 286.54           | 19%           | Alcohol/ether           | 286.49            | 16%           |
|                |         | 288.64           | 7%            | Carboxyl                | 288.51            | 21%           |
|                | S       | 162.39           | 30%           | Sulfide, mercaptan      | 161.92            | 6%            |
|                |         | 168.82           | 70%           | Sulfate, sulfone        | 168.88            | 94%           |
|                | Fe      | 711.44           | 100%          | Iron oxides, hydroxides | 710.48            | 100%          |
| 2.45<br>Mode 2 | C       | 284.74           | 71%           | Hydrocarbon             | 284.85            | 57%           |
|                |         | 286.53           | 16%           | Alcohol/ether           | 286.59            | 17%           |
|                |         | 288.52           | 13%           | Carboxyl                | 288.71            | 27%           |
|                | S       | 162.62           | 10%           | Sulfide, mercaptan      | 162.01            | 0%            |
|                |         | 168.9            | 90%           | Sulfate, sulfone        | 168.67            | 100%          |
|                | Fe      | 710.97           | 100%          | Iron oxides, hydroxides | 710.73            | 100%          |

**Blend 2 (base oil + 0.05 wt% ZDDP)**

| Load (kg)       | Element | On-Scar Analysis |               |                         | Off-Scar Analysis |               |
|-----------------|---------|------------------|---------------|-------------------------|-------------------|---------------|
|                 |         | Energy (eV)      | Peak Area (%) | Chemical State          | Energy (eV)       | Peak Area (%) |
| 1.22            | C       | 284.5            | 61%           | Hydrocarbon             | 284.78            | 59%           |
|                 |         | 285.71           | 26%           | Alcohol/ether           | 286.43            | 20%           |
|                 |         | 288.58           | 13%           | Carboxyl                | 288.63            | 21%           |
|                 | S       | 162.07           | 84%           | Sulfide, mercaptan      | 162.4             | 39%           |
|                 |         | 169.58           | 16%           | Sulfate, sulfone        | 169.04            | 61%           |
|                 | Fe      | 710.66           | 100%          | Iron oxides, hydroxides | 710.49            | 100%          |
| 10.15<br>Mode 1 | C       | 284.77           | 73%           | Hydrocarbon             | 284.72            | 54%           |
|                 |         | 286.26           | 22%           | Alcohol/ether           | 286.25            | 22%           |
|                 |         | 287.54           | 5%            | Carboxyl                | 288.55            | 24%           |
|                 | S       | 162.49           | 100%          | Sulfide, mercaptan      | 162.17            | 50%           |
|                 |         | 168.86           | 0%            | Sulfate, sulfone        | 168.91            | 50%           |
|                 | Fe      | 710.48           | 0%            | Iron oxides, hydroxides | 710.5             | 100%          |
| 10.15<br>Mode 2 | C       | 284.81           | 71%           | Hydrocarbon             | 284.75            | 60%           |
|                 |         | 286.4            | 26%           | Alcohol/ether           | 286.34            | 17%           |
|                 |         | 288.9            | 3%            | Carboxyl                | 288.61            | 23%           |
|                 | S       | 162.55           | 98%           | Sulfide, mercaptan      | 162.45            | 45%           |
|                 |         | 169.24           | 2%            | Sulfate, sulfone        | 168.79            | 55%           |
|                 | Fe      | 711.74           | 100%          | Iron oxides, hydroxides | 710.41            | 100%          |

**Blend 3 (base oil + 0.08 wt% ZDDP)**

| Load (kg) | Element | On-Scar Analysis |               |                         | Off-Scar Analysis |               |
|-----------|---------|------------------|---------------|-------------------------|-------------------|---------------|
|           |         | Energy (eV)      | Peak Area (%) | Chemical State          | Energy (eV)       | Peak Area (%) |
| 1.22      | C       | 284.59           | 57%           | Hydrocarbon             | 284.91            | 58%           |
|           |         | 285.85           | 27%           | Alcohol/ether           | 286.98            | 15%           |
|           |         | 288.63           | 16%           | Carboxyl                | 288.83            | 27%           |
|           | S       | 161.91           | 91%           | Sulfide, mercaptan      | 161.94            | 49%           |
|           |         | 169.81           | 9%            | Sulfate, sulfone        | 168.71            | 51%           |
|           | Fe      | 710.69           | 100%          | Iron oxides, hydroxides | 710.1             | 100%          |
| 10.15     | C       | 284.76           | 62%           | Hydrocarbon             | 284.77            | 51%           |
|           |         | 286.25           | 30%           | Alcohol/ether           | 286.35            | 25%           |
|           |         | 288.13           | 8%            | Carboxyl                | 288.7             | 24%           |
|           | S       | 162.38           | 100%          | Sulfide, mercaptan      | 162.28            | 67%           |
|           |         | 167.16           | 0%            | Sulfate, sulfone        | 168.74            | 33%           |
|           | Fe      | 710.99           | 100%          | Iron oxides, hydroxides | 710.79            | 100%          |

**Blend 4 (base oil + 0.1 wt% dispersant A)**

| Load (kg) | Element | On-Scar Analysis |               |                        | Off-Scar Analysis |               |
|-----------|---------|------------------|---------------|------------------------|-------------------|---------------|
|           |         | Energy (eV)      | Peak Area (%) | Chemical State         | Energy (eV)       | Peak Area (%) |
| 1.22      | C       | 284.81           | 64%           | Hydrocarbon            | 284.64            | 56%           |
|           |         | 286.87           | 19%           | Alcohol/ether          | 286.41            | 16%           |
|           |         | 288.55           | 17%           | Carboxyl               | 288.2             | 27%           |
|           | S       | 162.54           | 15%           | Sulfide, mercaptan     | 162.04            | 44%           |
|           |         | 168.55           | 85%           | Sulfate, sulfone       | 168.81            | 56%           |
|           | Fe      | 710.33           | 100%          | Iron oxides, hydroxide | 709.68            | 100%          |

**Blend 5 (base oil + 0.1 wt% dispersant B)**

| Load (kg) | Element | On-Scar Analysis |               |                         | Off-Scar Analysis |               |
|-----------|---------|------------------|---------------|-------------------------|-------------------|---------------|
|           |         | Energy (eV)      | Peak Area (%) | Chemical State          | Energy (eV)       | Peak Area (%) |
| 1.22      | C       | 284.77           | 54%           | Hydrocarbon             | 284.51            | 51%           |
|           |         | 286.27           | 33%           | Alcohol/ether           | 286.19            | 29%           |
|           |         | 288.53           | 13%           | Carboxyl                | 288.3             | 20%           |
|           | S       | 162.01           | 0%            | Sulfide, mercaptan      | 162.01            | 0%            |
|           |         | 168.86           | 100%          | Sulfate, sulfone        | 168.84            | 100%          |
|           | Fe      | 710.24           | 100%          | Iron oxides, hydroxides | 709.86            | 100%          |

**Blend 6 (base oil + 0.1 wt% dispersant A)**

| Load (kg)      | Element | On-Scar Analysis |               |                         | Off-Scar Analysis |               |
|----------------|---------|------------------|---------------|-------------------------|-------------------|---------------|
|                |         | Energy (eV)      | Peak Area (%) | Chemical State          | Energy (eV)       | Peak Area (%) |
| 1.22           | C       | 284.82           | 67%           | Hydrocarbon             | 284.82            | 56%           |
|                |         | 286.51           | 17%           | Alcohol/ether           | 286.44            | 22%           |
|                |         | 288.67           | 16%           | Carboxyl                | 288.57            | 21%           |
|                | S       | 161.39           | 95%           | Sulfide, mercaptan      | 162.01            | 0%            |
|                |         | 168.67           | 5%            | Sulfate, sulfone        | 168.67            | 100%          |
|                | Fe      | 710.44           | 100%          | Iron oxides, hydroxides | 710.28            | 100%          |
| 7.49<br>Mode 1 | C       | 284.47           | 69%           | Hydrocarbon             | 284.38            | 52%           |
|                |         | 286.07           | 27%           | Alcohol/ether           | 286.02            | 31%           |
|                |         | 287.9            | 3%            | Carboxyl                | 288.02            | 17%           |
|                | S       | 161.42           | 97%           | Sulfide, mercaptan      | 162.38            | 21%           |
|                |         | 169.35           | 3%            | Sulfate, sulfone        | 168.12            | 79%           |
|                | Fe      | 710.5            | 100%          | Iron oxides, hydroxides | 709.34            | 100%          |
| 7.49<br>Mode 2 | C       | 284.28           | 51%           | Hydrocarbon             | 284.79            | 59%           |
|                |         | 285.76           | 40%           | Alcohol/ether           | 286.31            | 20%           |
|                |         | 287.88           | 9%            | Carboxyl                | 288.45            | 21%           |
|                | S       | 161.54           | 100%          | Sulfide, mercaptan      | 162.02            | 92%           |
|                |         | 168.86           | 0%            | Sulfate, sulfone        | 168.83            | 8%            |
|                | Fe      | 710.5            | 100%          | Iron oxides, hydroxides | 710.31            | 100%          |
| 10.15          | C       | 284.54           | 57%           | Hydrocarbon             | 284.83            | 57%           |
|                |         | 286.18           | 32%           | Alcohol/ether           | 286.58            | 26%           |
|                |         | 288.3            | 11%           | Carboxyl                | 288.5             | 17%           |
|                | S       | 161.7            | 97%           | Sulfide, mercaptan      | 162.23            | 63%           |
|                |         | 166              | 3%            | Sulfate, sulfone        | 168.4             | 37%           |
|                | Fe      | 710.5            | 100%          | Iron oxides, hydroxides | 710.06            | 100%          |

**Blend 7 (base oil + 0.05 wt% ZDDP + 0.1 wt% dispersant B)**

| Load (kg)       | Element | On-Scar Analysis |               |                         | Off-Scar Analysis |               |
|-----------------|---------|------------------|---------------|-------------------------|-------------------|---------------|
|                 |         | Energy (eV)      | Peak Area (%) | Chemical State          | Energy (eV)       | Peak Area (%) |
| 1.22            | C       | 284.63           | 66%           | Hydrocarbon             | 284.81            | 57%           |
|                 |         | 286.24           | 24%           | Alcohol/ether           | 286.43            | 24%           |
|                 |         | 288.28           | 10%           | Carboxyl                | 288.51            | 19%           |
|                 | S       | 161.67           | 93%           | Sulfide, mercaptan      | 162.92            | 38%           |
|                 |         | 168.76           | 7%            | Sulfate, sulfone        | 168.75            | 63%           |
|                 | Fe      | 710.71           | 100%          | Iron oxides, hydroxides | 710.15            | 100%          |
| 7.49<br>Mode 1  | C       | 284.33           | 56%           | Hydrocarbon             | 284.69            | 56%           |
|                 |         | 285.8            | 36%           | Alcohol/ether           | 286.35            | 28%           |
|                 |         | 287.84           | 8%            | Carboxyl                | 288.49            | 16%           |
|                 | S       | 161.47           | 99%           | Sulfide, mercaptan      | 162.35            | 33%           |
|                 |         | 168.6            | 1%            | Sulfate, sulfone        | 168.1             | 67%           |
|                 | Fe      | 710.56           | 100%          | Iron oxides, hydroxides | 710.14            | 100%          |
| 7.49<br>Mode 2  | C       | 284.79           | 77%           | Hydrocarbon             | 284.8             | 62%           |
|                 |         | 286.45           | 19%           | Alcohol/ether           | 286.55            | 14%           |
|                 |         | 288.12           | 4%            | Carboxyl                | 288.56            | 23%           |
|                 | S       | 162.17           | 93%           | Sulfide, mercaptan      | 162.01            | 0%            |
|                 |         | 169.08           | 7%            | Sulfate, sulfone        | 168.86            | 100%          |
|                 | Fe      | 710.59           | 100%          | Iron oxides, hydroxides | 710.43            | 100%          |
| 10.15<br>Mode 1 | C       | 284.68           | 63%           | Hydrocarbon             | 284.79            | 64%           |
|                 |         | 286.22           | 32%           | Alcohol/ether           | 286.54            | 16%           |
|                 |         | 288.28           | 5%            | Carboxyl                | 288.63            | 21%           |
|                 | S       | 162.27           | 91%           | Sulfide, mercaptan      | 162.64            | 16%           |
|                 |         | 168.6            | 9%            | Sulfate, sulfone        | 168.86            | 84%           |
|                 | Fe      | 710.97           | 100%          | Iron oxides, hydroxides | 710.7             | 100%          |
| 10.15<br>Mode 2 | C       | 284.84           | 69%           | Hydrocarbon             | 284.76            | 53%           |
|                 |         | 286.41           | 27%           | Alcohol/ether           | 286.38            | 28%           |
|                 |         | 288.11           | 4%            | Carboxyl                | 288.55            | 20%           |
|                 | S       | 162.02           | 95%           | Sulfide, mercaptan      | 163.33            | 33%           |
|                 |         | 168.47           | 5%            | Sulfate, sulfone        | 168.99            | 67%           |
|                 | Fe      | 711.12           | 100%          | Iron oxides, hydroxides | 710.51            | 100%          |

### SIII. Elemental depth profiles

Elemental depth profiles for various blends and loads are shown in this section. The table below shows the legend of detected elements in the tribofilms.

|             |               |              |              |               |
|-------------|---------------|--------------|--------------|---------------|
| —■— Carbide | —□— Organic C | —×— Amine    | —○— O tot    | —◆— Phosphate |
| —◇— Sulfide | —✱— Ca        | —▲— Fe metal | —△— Fe oxide | —◇— Zn        |

### Blend 1

Load = 1.22 kg

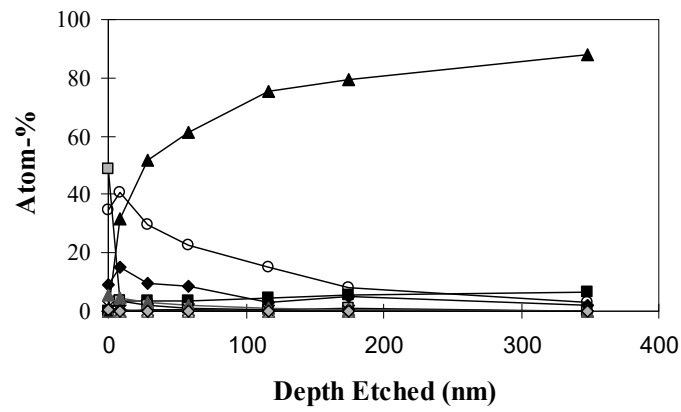

Load = 2.45 kg (mode M1)

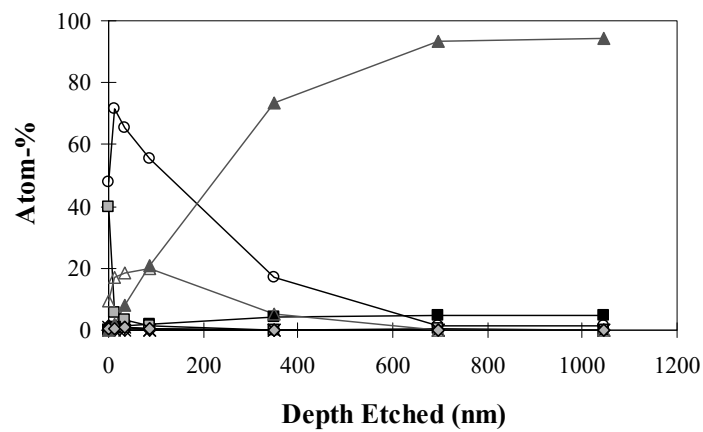

Load = 2.45 kg (mode M2)

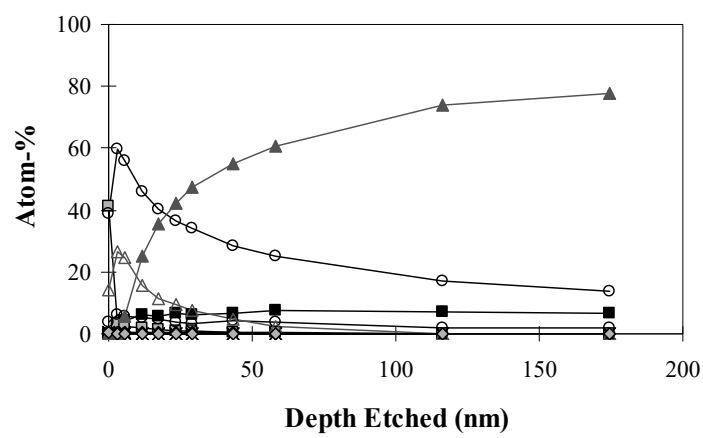

## Blend 2

Load = 1.22 kg

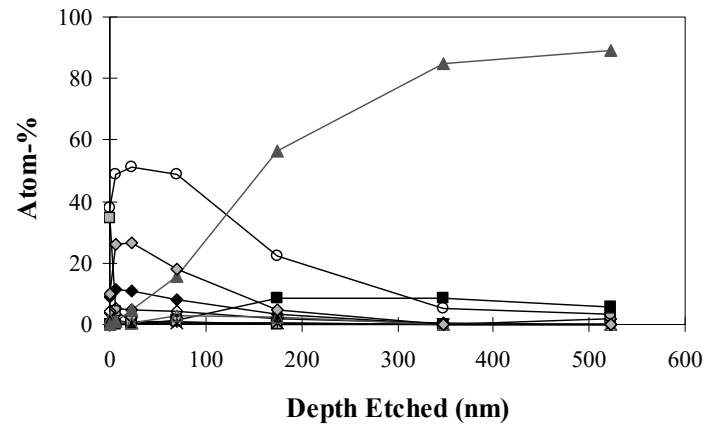

Load = 10.15 kg (mode M1)

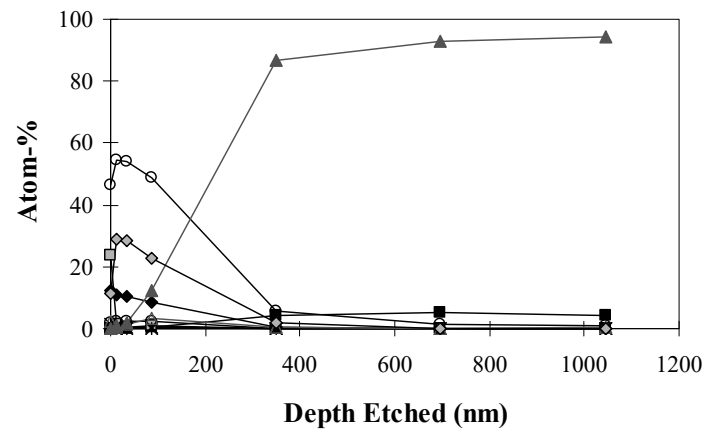

Load = 10.15 kg (mode M2)

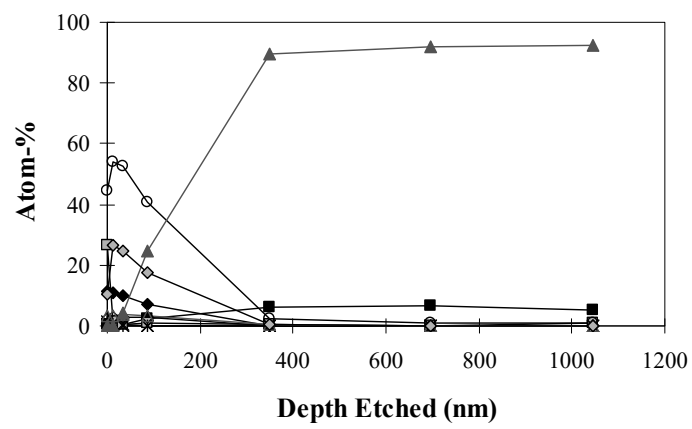

### Blend 3

Load = 1.22 kg

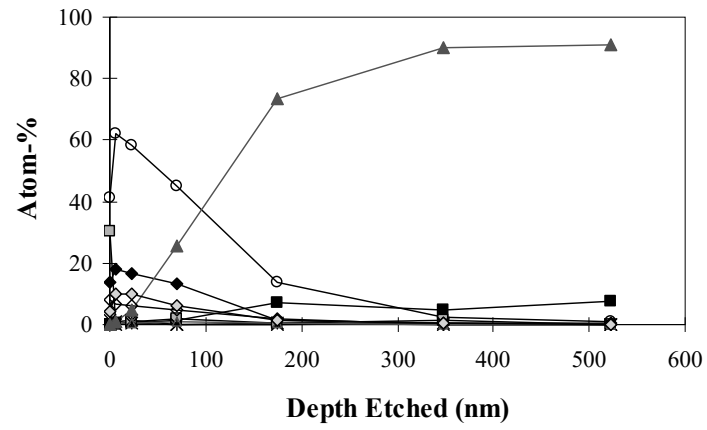

Load = 10.15 kg

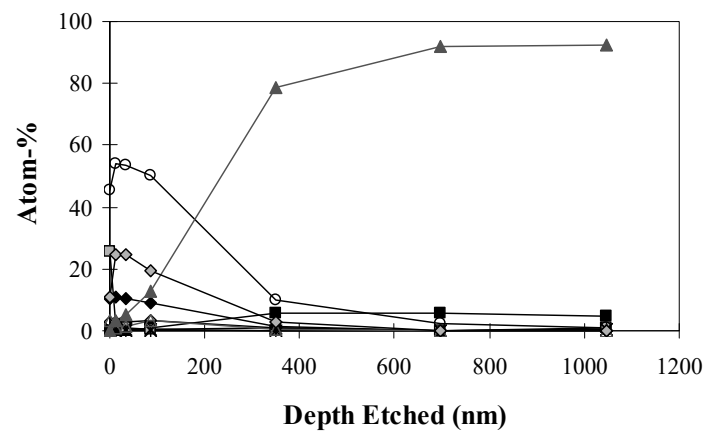

### Blend 4

Load = 1.22 kg

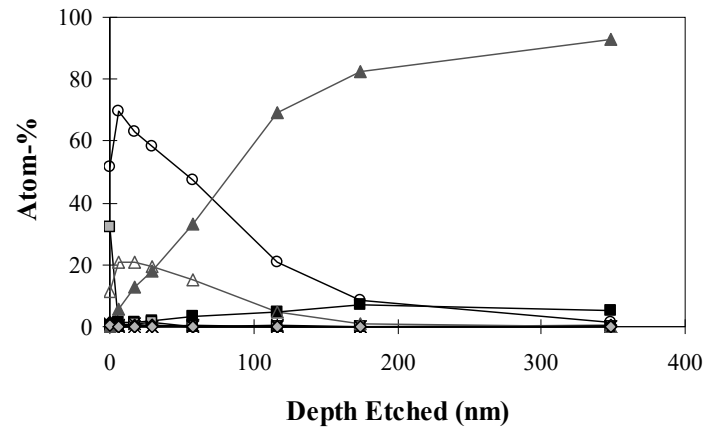

### Blend 5

Load = 1.22 kg

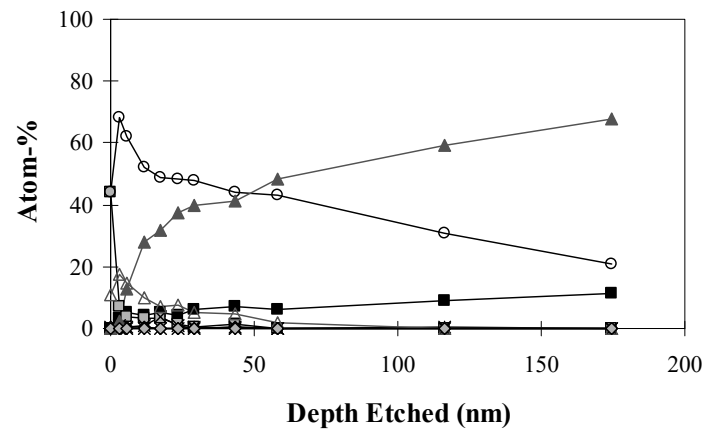

### Blend 6

Load = 1.22 kg

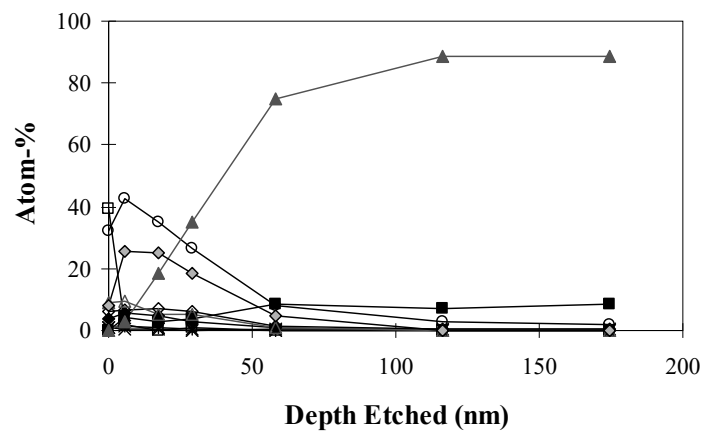

Load = 7.49 kg (mode M1)

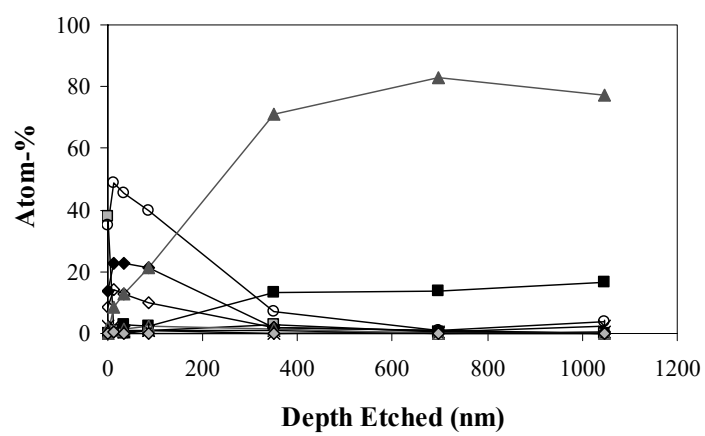

Load = 7.49 kg (mode M2)

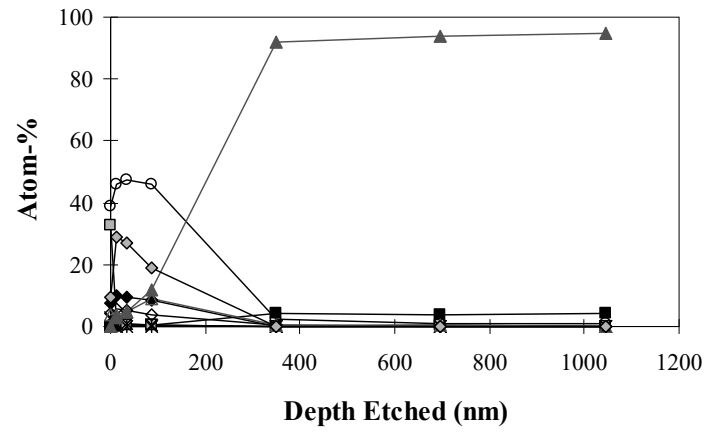

Load = 10.15 kg

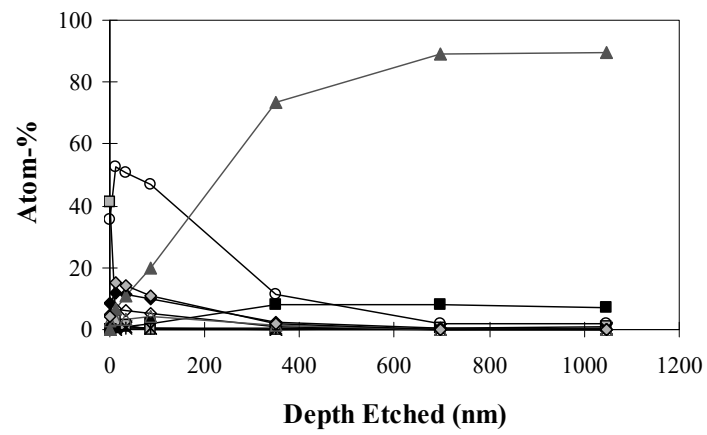

### Blend 7

Load = 1.22 kg

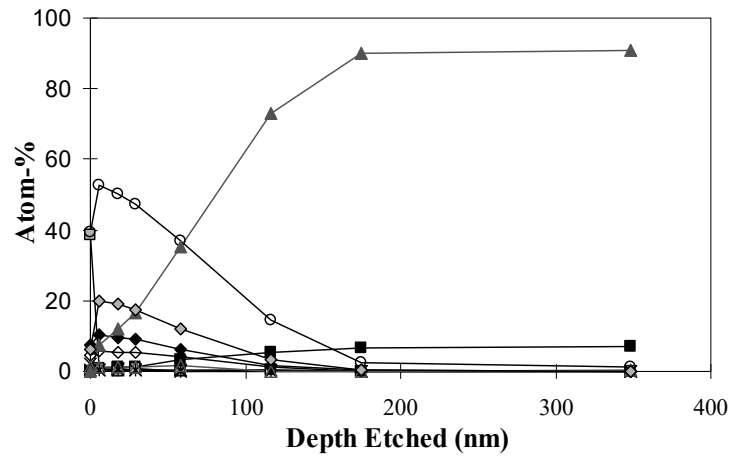

Load = 7.49 kg (mode M1)

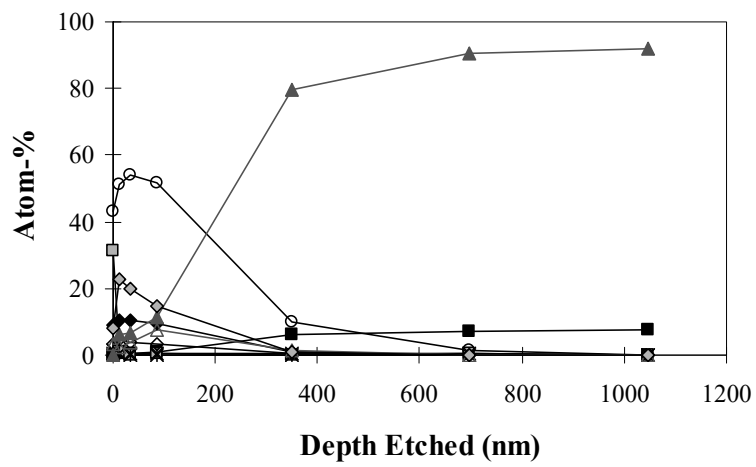

Load = 7.49 kg (mode M2)

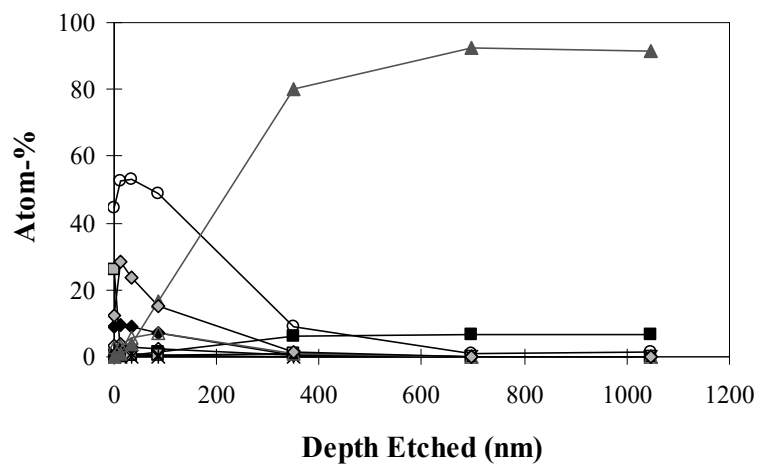

Load = 10.15 kg (mode M1)

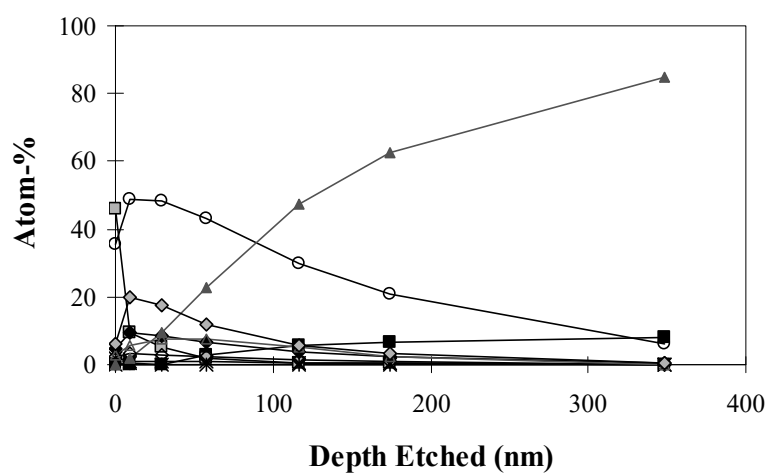

Load = 10.15 kg (mode M2)

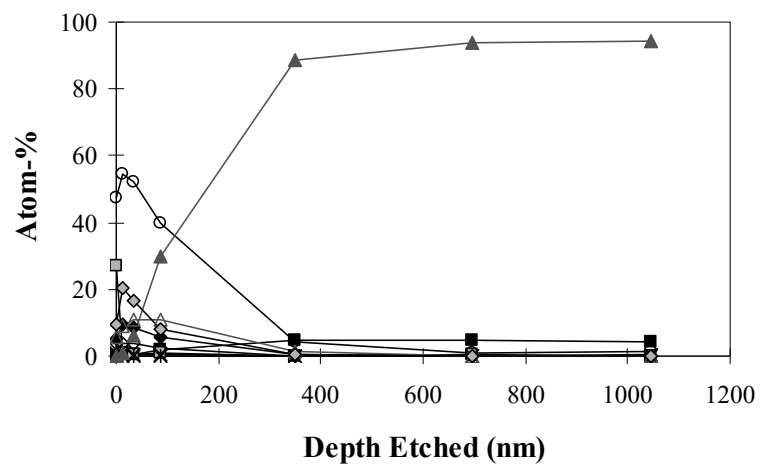

Supplement: s1 [file s1]
